# Supplementary material for: Innovative methodology for the identification of soluble biomarkers in fresh tissues
Source: PubMed Central journal article supplement (PMC5828218; doi:10.18632/oncotarget.24366), 2018-01-31
Supplement: oncotarget-09-10665-s002.pdf [file oncotarget-09-10665-s002.pdf]

Table S1. Patients clinical characteristics

| Patients ID | Tissue type    | Surgery date       | TNM          | Tumor type                                                    | Outcome | Kras Status       | MMR                                 | Proteomic | Metabolomic | Exosomes isolation | miRNome | tDNA analysis |
|-------------|----------------|--------------------|--------------|---------------------------------------------------------------|---------|-------------------|-------------------------------------|-----------|-------------|--------------------|---------|---------------|
| 12BTQ08010  | CRC;<br>CRC-LM | May-12             | pT3N2bM1a    | ADK moderately to poorly differentiated                       | Alive   | wt                | Not mutated                         | X         | ✓✓          | X                  | X       | ✓             |
| 14BTQ08079  | CRC            | Nov-14             | pT4bN0Mx     | ADK moderately differentiated                                 | Alive   | Not tested        | Not mutated                         | ✓         | ✓           | X                  | X       | X             |
| 14BTQ08081  | CRC            | Nov-14             | pT3N2aMx     | ADK moderately differentiated                                 | Alive   | Not tested        | Not mutated                         | ✓         | ✓           | X                  | X       | X             |
| 14BTQ08084  | CRC            | Dec-14             | pT4aN2aMx    | ADK moderately to poorly differentiated                       | Alive   | wt                | Not mutated                         | X         | ✓           | X                  | X       | ✓             |
| 14BTQ08086  | CRC            | Dec-14             | pT3 N1b Mx   | ADK colloid moderately differentiated                         | Alive   | Not tested        | Loss of expression of MLH1 and PMS2 | X         | ✓           | X                  | X       | ✓             |
| 15BTQ08000  | CRC            | Jan-15             | pT3N0Mx      | ADK moderately to poorly differentiated                       | Alive   | Not tested        | Loss of expression of MSH-6         | ✓         | ✓           | X                  | X       | ✓             |
| 15BTQ08001  | CRC            | Jan-15             | pT3N1Mx      | ADK moderately differentiated                                 | Alive   | Not tested        | Loss of expression of MSH-6         | X         | ✓           | X                  | X       | ✓             |
| 15BTQ08007  | CRC            | Jan-15             | pT3N0Mx      | ADK moderately differentiated                                 | Alive   | Not tested        | Not mutated                         | X         | ✓           | X                  | X       | X             |
| 15BTQ08008  | CRC            | Jan-15             | pT3N2bMx     | ADK infiltrating moderately differentiated                    | Alive   | Not tested        | Not mutated                         | X         | ✓           | X                  | X       | X             |
| 15BTQ08009  | CRC            | Jan-15             | pT3N2aMx     | ADK moderately differentiated                                 | Alive   | Not tested        | Not mutated                         | X         | ✓           | X                  | X       | X             |
| 15BTQ08026  | CRC            | Mar-15             | pT4b N2b M1b | ADK colloid moderately differentiated                         | Dead    | Mutation codon 12 | Not tested                          | X         | ✓           | X                  | X       | ✓             |
| 15BTQ08041  | CRC;<br>CRC-LM | Jun-15             | pT3N0M1a     | ADK moderately differentiated                                 | Alive   | wt                | Not mutated                         | X         | ✓✓          | X                  | X       | ✓             |
| 15BTQ08045  | CRC;<br>CRC-LM | Jun-15             | pT3N1bM1a    | ADK moderately differentiated                                 | Alive   | Mutation codon 12 | Not mutated                         | ✓         | ✓✓          | ✓                  | ✓       | ✓             |
| 15BTQ08046  | CRC;<br>CRC-LM | Jun-2015; Dec-2015 | pT4bN2nMx    | ADK colloid poorly to moderately differentiated               | Alive   | Not tested        | Not mutated                         | ✓         | X           | ✓                  | ✓       | ✓             |
| 15BTQ08048  | CRC            | Jun-15             | pT3N0Mx.     | ADK infiltrating moderately differentiated                    | Alive   | Not tested        | Not mutated                         | ✓         | X           | X                  | X       | X             |
| 15BTQ08049  | CRC            | Jun-15             | pT4aN0Mx     | ADK mucinous                                                  | Alive   | Not tested        | Not mutated                         | ✓         | X           | X                  | ✓       | X             |
| 15BTQ08053  | CRC            | Jul-15             | T4bN1M1b.    | ADK moderately differentiated                                 | Alive   | Mutation codon 13 | Loss of expression of MLH1 and PMS2 | X         | X           | X                  | X       | ✓             |
| 16BTQ08000  | CRC            | Jan-16             | pT4aN2aM1a   | ADK poorly differentiated                                     | Alive   | wt                | Loss of expression of MLH1 and PMS3 | X         | X           | X                  | X       | ✓             |
| 16BTQ08001  | CRC            | Jan-16             | pT3N2cM1a    | ADK moderately differentiated                                 | Alive   | Not tested        | Not mutated                         | X         | X           | X                  | X       | ✓             |
| 12BTQ08002  | CRC-LM         | Jan-12             | -            | ADK of colon                                                  | Alive   | wt                | Not mutated                         | ✓         | ✓           | X                  | X       | ✓             |
| 12BTQ08018  | CRC-LM         | Sep-12             | -            | ADK of ileum-colon                                            | Alive   | wt                | Not mutated                         | ✓         | ✓           | X                  | X       | ✓             |
| 11BTQ08033  | CRC-LM         | Jun-11             | -            | ADK rectum                                                    | Alive   | wt                | Not mutated                         | ✓         | ✓           | X                  | X       | ✓             |
| 12BTQ08012  | CRC-LM         | Jun-12             | -            | ADK of the rectosigmoid junction                              | Alive   | wt                | Not mutated                         | ✓         | ✓           | X                  | X       | ✓             |
| 12BTQ08027  | CRC-LM         | Nov-12             | -            | ADK recto-sigmoide                                            | Alive   | Mutation codon 12 | Not mutated                         | ✓         | ✓           | X                  | X       | ✓             |
| 12BTQ08013  | CRC-LM         | Jun-12             | -            | Sigmoidectomy for ADK (Dec 2007); ADK ileo-colon (20/06/2008) | Dead    | wt                | Not mutated                         | ✓         | ✓           | X                  | X       | ✓             |
| 15BTQ08032  | CRC-LM         | Apr-15             | -            | ADK of colon                                                  | Alive   | wt                | Not tested                          | X         | ✓           | X                  | X       | ✓             |
| 16BTQ08004  | CRC-LM         | Jan-16             | -            | ADK of colon                                                  | Alive   | Mutation codon 12 | Not mutated                         | X         | X           | ✓                  | X       | ✓             |

CRC: colorectal cancer  
CRC-LM: colorectal cancer liver metastasis  
ADK: adenocarcinoma
