# Supplementary material for: Innovative methodology for the identification of soluble biomarkers in fresh tissues
Source: PubMed Central journal article supplement (PMC5828218; doi:10.18632/oncotarget.24366), 2018-01-31
Supplement: oncotarget-09-10665-s003.pdf [file oncotarget-09-10665-s003.pdf]

Table S2. Patients clinical informations

| Patient ID | Gender | Sampling date           | Age | Pathology    | Localization | Status of the patient | TNM        | MS status |
|------------|--------|-------------------------|-----|--------------|--------------|-----------------------|------------|-----------|
| 1          | F      | 6/6/12                  | 90  | ADK          | Rectum       | Naive                 | pT3N0M1    | NR        |
| 2          | M      | 21/06/2012 and 25/06/12 | 76  | ADK          | Rectum       | Naive                 | pT3N1M0    | NR        |
| 3          | F      | 8/8/12                  | 73  | ADK          | Right colon  | Naive                 | pT4aN0M1a  | MSI       |
| 4          | M      | 10/23/12                | 80  | ADK          | Rectum       | Under treatment       | pT3NxM1    | MSS       |
| 5          | F      | 10/31/12                | 60  | ADK          | Right colon  | Naive                 | pT3N0Mx    | MSS       |
| 6          | F      | 11/6/12                 | 76  | ADK          | Sigmoide     | Under treatment       | pT3N2aMx   | MSS       |
| 7          | F      | 11/8/12                 | 81  | ADK          | Right colon  | Naive                 | pT3N0Mx    | MSI       |
| 8          | M      | 23/7/2013               | 69  | ADK          | Rectum       | Naive                 | pT3NxMx    | NR        |
| 9          | F      | 26/6/2013               | 84  | ADK          | Right colon  | Naive                 | pT4bN0Mx   | NR        |
| 10         | F      | 26/6/2013               | 85  | ADK          | Sigmoide     | Naive                 | pT4aN1aM1b | NR        |
| 11         | F      | 5/9/13                  | 75  | ADK          | Sigmoide     | Naive                 | pT4bN1bM1a | NR        |
| 12         | F      | 5/17/13                 | 67  | ADK          | Right colon  | Under treatment       | pT4aN0Mx   | MSS       |
| 13         | F      | 5/17/13                 | 80  | ADK          | Rectum       | Under treatment       | pT4bN0Mx   | MSS       |
| 14         | F      | 26/6/2013               | 71  | ADK          | Sigmoide     | Under treatment       | pT4aN0Mx   | MSI       |
| 15         | F      | 12/7/13                 | 76  | ADK          | Rectum       | Under treatment       | pT4N3M0    | NR        |
| 16         | F      | 27/8/2013               | 33  | ADK          | Left colon   | Under treatment       | pT4bN1bM1a | MSS       |
| 17         | M      | 7/23/13                 | 52  | ADK          | Sigmoide     | Under treatment       | pT4aN2aM+  | MSS       |
| 18         | F      | 11/6/12                 | 64  | Healthy CTRL |              |                       |            |           |
| 19         | M      | 1/23/13                 | 58  | Healthy CTRL |              |                       |            |           |
| 20         | F      | 1/23/13                 | 63  | Healthy CTRL |              |                       |            |           |
| 21         | M      | 1/15/13                 | 78  | Healthy CTRL |              |                       |            |           |
| 22         | F      | 10/26/12                | 60  | Healthy CTRL |              |                       |            |           |
| 23         | F      | 11/14/12                | 63  | Healthy CTRL |              |                       |            |           |
| 24         | M      | 10/15/12                | 43  | Healthy CTRL |              |                       |            |           |
| 25         | F      | 12/14/12                | 66  | Healthy CTRL |              |                       |            |           |
| 26         | F      | 9/17/13                 | 70  | Healthy CTRL |              |                       |            |           |
| 27         | F      | 2/4/15                  | 68  | Healthy CTRL |              |                       |            |           |
| 28         | F      | 11/26/12                | 65  | Healthy CTRL |              |                       |            |           |
| 29         | M      | 1/16/13                 | 52  | Healthy CTRL |              |                       |            |           |
| 30         | F      | 5/5/14                  | 68  | Healthy CTRL |              |                       |            |           |
| 31         | F      | 8/24/46                 | 67  | Healthy CTRL |              |                       |            |           |
| 32         | F      | 10/3/14                 | 65  | Healthy CTRL |              |                       |            |           |

MSS: microsatellite stable

MSI: microsatellite instable
