# Supplementary material for: Innovative methodology for the identification of soluble biomarkers in fresh tissues
Source: PubMed Central journal article supplement (PMC5828218; doi:10.18632/oncotarget.24366), 2018-01-31
Supplement: oncotarget-09-10665-s004.pdf [file oncotarget-09-10665-s004.pdf]

Table S3. Candidate protein biomarkers for CRC

| Protein IDs   | Protein names                                                             | Gene names     | Log2 FC | NC | CRC | Subcellular localization                                 |
|---------------|---------------------------------------------------------------------------|----------------|---------|----|-----|----------------------------------------------------------|
| P49006        | MARCKS-related protein                                                    | MARCKSL1       | CRC     | 0  | 4   | Plasma membrane; extracellular exosomes                  |
| P22894        | Neutrophil collagenase                                                    | MMP8           | CRC     | 0  | 4   | Extracellular space                                      |
| Q9H3R2        | Mucin-13                                                                  | MUC13          | CRC     | 0  | 4   | Extracellular space                                      |
| O75340        | Programmed cell death protein 6                                           | PDC6           | CRC     | 0  | 4   | Nucleus; endoplasmic reticulum; extracellular exosomes   |
| Q9BVK6        | Transmembrane emp24 domain-containing protein 9                           | TMED9          | CRC     | 0  | 4   | Golgi apparatus; membrane; extracellular exosomes        |
| Q13509        | Tubulin beta-3 chain                                                      | TUBB3          | CRC     | 0  | 4   | Nucleus; cytosol; membrane; extracellular exosomes       |
| P49913        | Cathelicidin antimicrobial peptide                                        | CAMP           | CRC     | 0  | 4   | Extracellular space                                      |
| Q9Y2V2        | Calcium-regulated heat stable protein 1                                   | CARHSP1        | CRC     | 0  | 4   | Cytoplasm; extracellular exosomes                        |
| P32320        | Cytidine deaminase                                                        | CDA            | CRC     | 0  | 4   | Extracellular space                                      |
| P40199        | Carcinoembryonic antigen-related cell adhesion molecule 6                 | CEACAM6        | CRC     | 0  | 4   | Extracellular space                                      |
| Q9UHY7        | Enolase-phosphatase E1                                                    | ENOPH1         | CRC     | 0  | 4   | Nucleus; extracellular exosomes                          |
| P28676        | Grancalcin                                                                | GCA            | CRC     | 0  | 4   | Plasma membrane; extracellular exosomes                  |
| P28799        | Granulins                                                                 | GRN            | CRC     | 0  | 4   | Extracellular space                                      |
| Q53G00        | Estradiol 17-beta-dehydrogenase 12                                        | HSD17B12       | CRC     | 0  | 4   | Extracellular matrix                                     |
| P17213        | Bactericidal permeability-increasing protein                              | BPI            | 1.90    | 3  | 4   | Extracellular space                                      |
| P05451        | Lithostathine-1-alpha                                                     | REG1A          | 1.74    | 3  | 4   | Extracellular exosomes                                   |
| P49588        | Alanine-tRNA ligase, cytoplasmic                                          | AARS           | 1.57    | 5  | 4   | Mitochondria; extracellular exosomes                     |
| Q9NYU2;Q9NYU1 | UDP-glucose:glycoprotein glucosyltransferase 1                            | UGGT1          | 1.46    | 3  | 4   | Endoplasmic reticulum; extracellular exosomes            |
| O00487        | 26S proteasome non-ATPase regulatory subunit 14                           | PSMD14         | 1.46    | 3  | 4   | Proteasome; cytosol; extracellular exosomes              |
| P49368        | T-complex protein 1 subunit gamma                                         | CCT3           | 1.15    | 6  | 4   | Plasma membrane; extracellular exosomes                  |
| P62857        | 40S ribosomal protein S28                                                 | RPS28          | 1.07    | 5  | 4   | Cytoplasm; extracellular exosomes                        |
| Q99460        | 26S proteasome non-ATPase regulatory subunit 1                            | PSMD1          | 1.06    | 4  | 4   | Nucleus; cytosol; membrane; extracellular exosomes       |
| P62318        | Small nuclear ribonucleoprotein Sm D3                                     | SNRPD3         | 1.04    | 3  | 4   | Nucleoplasm; extracellular exosomes                      |
| Q95793        | Double-stranded RNA-binding protein Staufen homolog 1                     | STAU1          | CRC     | 0  | 5   | Membrane; extracellular exosomes                         |
| Q9H807        | UPF0160 protein MYG1, mitochondrial                                       | C12orf10       | CRC     | 0  | 5   | Extracellular exosomes                                   |
| O14979        | Heterogeneous nuclear ribonucleoprotein D-like                            | HNRNPDL        | CRC     | 0  | 5   | Cytoplasm; extracellular exosomes                        |
| P15090;P02689 | Fatty acid-binding protein, adipocyte                                     | FABP4          | 38.73   | 3  | 5   | Cytoplasm; extracellular exosomes                        |
| P49327        | Fatty acid synthase                                                       | FASN           | 2.64    | 5  | 5   | Plasma membrane; Golgi apparatus; extracellular exosomes |
| P32969        | 60S ribosomal protein L9                                                  | RPL9           | 2.54    | 3  | 5   | Cytoplasm; nucleus; extracellular matrix                 |
| P24821        | Tenascin                                                                  | TNC            | 2.53    | 3  | 5   | Extracellular space                                      |
| P41250        | Glycine-tRNA ligase                                                       | GARS           | 2.37    | 6  | 5   | Cytoplasm; extracellular exosomes                        |
| Q14247        | Src substrate cortactin                                                   | CTTN           | 2.02    | 4  | 5   | Golgi apparatus; extracellular exosomes                  |
| Q99829        | Copine-1                                                                  | CPNE1          | 1.99    | 4  | 5   | Membrane; extracellular exosomes                         |
| Q01813        | ATP-dependent 6-phosphofructokinase, platelet type                        | PFKFB          | 1.91    | 3  | 5   | Nucleus; membrane; extracellular matrix                  |
| P62195;Q8NB90 | 26S protease regulatory subunit 8                                         | PSMC5          | 1.86    | 3  | 5   | Proteasome; nucleus; cytoplasm; extracellular exosomes   |
| P60866        | 40S ribosomal protein S20                                                 | RPS20          | 1.85    | 4  | 5   | Membrane; extracellular exosomes                         |
| P50454        | Serpin H1                                                                 | SERPINH1       | 1.84    | 4  | 5   | Extracellular space                                      |
| P15880        | 40S ribosomal protein S2                                                  | RPS2           | 1.73    | 4  | 5   | Nucleus; membrane; extracellular exosomes                |
| P39023;Q92901 | 60S ribosomal protein L3                                                  | RPL3           | 1.69    | 4  | 5   | Nucleus; extracellular exosomes                          |
| P14868        | Aspartate-tRNA ligase, cytoplasmic                                        | DARS           | 1.48    | 6  | 5   | Membrane; extracellular exosomes                         |
| P05198        | Eukaryotic translation initiation factor 2 subunit 1                      | EIF2S1         | 1.47    | 4  | 5   | Nucleus; extracellular exosomes                          |
| P52272        | Heterogeneous nuclear ribonucleoprotein M                                 | HNRNPM         | 1.43    | 6  | 5   | Membrane; extracellular matrix                           |
| P62244        | 40S ribosomal protein S15a                                                | RPS15A         | 1.40    | 4  | 5   | Membrane; extracellular matrix                           |
| P41091;Q2VIR3 | Eukaryotic translation initiation factor 2 subunit 3                      | EIF2S3;EIF253L | 1.31    | 5  | 5   | Nucleus; extracellular exosomes                          |
| P62424        | 60S ribosomal protein L7a                                                 | RPL7A          | 1.27    | 3  | 5   | Nucleus; membrane; extracellular exosomes                |
| P50991        | T-complex protein 1 subunit delta                                         | CCT4           | 1.26    | 6  | 5   | Cytoplasm; extracellular exosomes                        |
| O43242        | 26S proteasome non-ATPase regulatory subunit 3                            | PSMD3          | 1.24    | 4  | 5   | Membrane; extracellular matrix                           |
| P21281;P15313 | V-type proton ATPase subunit B, brain isoform                             | ATP6V1B2       | 1.24    | 3  | 5   | Plasma membrane; extracellular exosomes                  |
| P35268        | 60S ribosomal protein L22                                                 | RPL22          | 1.23    | 5  | 5   | Extracellular matrix                                     |
| Q13630        | GDP-L-fucose synthase                                                     | TSTA3          | 1.18    | 6  | 5   | Cytoplasm; extracellular exosomes                        |
| P39019        | 40S ribosomal protein S19                                                 | RPS19          | 1.06    | 4  | 5   | Extracellular space                                      |
| Q16543        | Hsp90 co-chaperone Cdc37                                                  | CDC37          | 1.05    | 4  | 5   | Cytoplasm; extracellular exosomes                        |
| O60888        | Protein CutA                                                              | CUTA           | 1.04    | 5  | 5   | Membrane; extracellular exosomes                         |
| P62249        | 40S ribosomal protein S16                                                 | RPS16          | 1.00    | 4  | 5   | Extracellular matrix                                     |
| Q01130;Q9BRL6 | Serine/arginine-rich splicing factor 2                                    | SRSF2;SRSF8    | CRC     | 0  | 6   | Nucleus; extracellular exosomes                          |
| O43491        | Band 4.1-like protein 2                                                   | EPB41L2        | 4.65    | 3  | 6   | Membrane; extracellular exosomes                         |
| P14780        | Matrix metalloproteinase-9                                                | MMP9           | 4.64    | 4  | 6   | Extracellular space                                      |
| P25815        | Protein S100-P                                                            | S100P          | 4.34    | 3  | 6   | Nucleus; extracellular exosomes                          |
| P22234        | Phosphoribosylaminoimidazole carboxylase                                  | PAICS          | 3.29    | 4  | 6   | Cytoplasm; membrane; extracellular exosomes              |
| P53396        | ATP-citrate synthase                                                      | ACLY           | 3.20    | 6  | 6   | Membrane; extracellular exosomes                         |
| Q02790        | Peptidyl-prolyl cis-trans isomerase FKBP4                                 | FKBP4          | 3.08    | 6  | 6   | Nucleoplasm; extracellular exosomes                      |
| P41218        | Myeloid cell nuclear differentiation antigen                              | MNDA           | 2.65    | 4  | 6   | Nucleus; extracellular exosomes                          |
| O75608        | Acyl-protein thioesterase 1                                               | LYPLA1         | 2.24    | 5  | 6   | Mitochondria; extracellular exosomes                     |
| P31949        | Protein S100-A11                                                          | S100A11        | 2.06    | 5  | 6   | Extracellular space                                      |
| P23396        | 40S ribosomal protein S3                                                  | RPS3           | 1.96    | 6  | 6   | Nucleus; cytosol; extracellular matrix                   |
| Q9UKK9        | ADP-sugar pyrophosphatase                                                 | NUDT5          | 1.94    | 5  | 6   | Membrane; extracellular matrix                           |
| P55884        | Eukaryotic translation initiation factor 3 subunit B                      | EIF3B          | 1.90    | 6  | 6   | Cytoplasm; extracellular exosomes                        |
| P61313        | 60S ribosomal protein L15                                                 | RPL15          | 1.86    | 5  | 6   | Nucleus; cytosol; extracellular exosomes                 |
| Q16531        | DNA damage-binding protein 1                                              | DBP1           | 1.82    | 6  | 6   | Nucleus; extracellular exosomes                          |
| Q15181        | Inorganic pyrophosphatase                                                 | PPA1           | 1.74    | 7  | 6   | Cytoplasm; extracellular exosomes                        |
| P00492        | Hypoxanthine-guanine phosphoribosyltransferase                            | HPRT1          | 1.70    | 6  | 6   | Cytoplasm; extracellular exosomes                        |
| P28062        | Proteasome subunit beta type-8                                            | PSMB8          | 1.70    | 5  | 6   | Cytoplasm; extracellular exosomes                        |
| P53621        | Coatomer subunit alpha                                                    | COPA           | 1.69    | 5  | 6   | Extracellular space                                      |
| P19338        | Nucleolin                                                                 | NCL            | 1.69    | 7  | 6   | Nucleus; membrane; extracellular exosomes                |
| P30740        | Leukocyte elastase inhibitor                                              | SERPINB1       | 1.66    | 5  | 6   | Extracellular space                                      |
| P46781        | 40S ribosomal protein S9                                                  | RPS9           | 1.60    | 5  | 6   | Nucleus; cytoplasm; membrane; extracellular exosomes     |
| P62701;Q8TD47 | 40S ribosomal protein S4, X isoform                                       | RPS4X          | 1.60    | 7  | 6   | Extracellular matrix; extracellular exosomes             |
| Q04179        | Superoxide dismutase [Mn], mitochondrial                                  | SOD2           | 1.59    | 6  | 6   | Mitochondria; extracellular exosomes                     |
| P20618        | Proteasome subunit beta type-1                                            | PSMB1          | 1.57    | 5  | 6   | Proteasome; extracellular exosomes                       |
| P62269        | 40S ribosomal protein S18                                                 | RPS18          | 1.54    | 5  | 6   | Nucleus; membrane; extracellular exosomes                |
| O43776        | Asparagine-tRNA ligase, cytoplasmic                                       | NARS           | 1.54    | 6  | 6   | Cytoplasm; extracellular exosomes                        |
| Q9UL46        | Proteasome activator complex subunit 2                                    | PSME2          | 1.47    | 3  | 6   | Nucleoplasm; cytoplasm; membrane; extracellular exosomes |
| P36578        | 60S ribosomal protein L4                                                  | RPL4           | 1.47    | 6  | 6   | nucleus; extracellular exosomes                          |
| P46782        | 40S ribosomal protein S5;40S ribosomal protein S5, N-terminally processed | RPS5           | 1.46    | 5  | 6   | Nucleus; membrane; extracellular matrix                  |
| P11216        | Glycogen phosphorylase, brain form                                        | PYGB           | 1.45    | 7  | 6   | Membrane; extracellular matrix                           |
| P48637        | Glutathione synthetase                                                    | GSS            | 1.44    | 5  | 6   | Cytoplasm; extracellular exosomes                        |
| P61081        | NEDD8-conjugating enzyme Ubc12                                            | UBE2M          | 1.41    | 3  | 6   | Cytoplasm; extracellular exosomes                        |
| P26599        | Poly(pyrimidine) tract-binding protein 1                                  | PTBP1          | 1.39    | 6  | 6   | Nucleus; membrane; extracellular exosomes                |
| P62277        | 40S ribosomal protein S13                                                 | RPS13          | 1.39    | 7  | 6   | Extracellular matrix                                     |
| Q15075        | Early endosome antigen 1                                                  | EEA1           | 1.35    | 4  | 6   | Cytoplasm; extracellular exosomes                        |
| Q07955        | Serine/arginine-rich splicing factor 1                                    | SRSF1          | 1.34    | 7  | 6   | Nucleus; extracellular exosomes                          |
| Q00839        | Heterogeneous nuclear ribonucleoprotein U                                 | HNRNPU         | 1.30    | 7  | 6   | Nucleus; extracellular matrix                            |
| P13861;P31323 | cAMP-dependent protein kinase type II-alpha regulatory subunit            | PRKAR2A        | 1.29    | 6  | 6   | Plasma membrane; extracellular exosomes                  |

|                    |                                                                     |                   |       |   |   |                                                         |
|--------------------|---------------------------------------------------------------------|-------------------|-------|---|---|---------------------------------------------------------|
| Q14103             | Heterogeneous nuclear ribonucleoprotein D0                          | HNRNPD            | 1.29  | 7 | 6 | Nucleus; extracellular exosomes                         |
| P13693             | Translationally-controlled tumor protein                            | TPT1              | 1.26  | 5 | 6 | Extracellular space                                     |
| P63244             | Guanine nucleotide-binding protein subunit beta-2-like 1            | GNB2L1            | 1.25  | 7 | 6 | Nucleus; membrane; extracellular matrix                 |
| P62081             | 40S ribosomal protein S7                                            | RPS7              | 1.24  | 6 | 6 | Nucleus; membrane; extracellular matrix                 |
| Q14204             | Cytoplasmic dynein 1 heavy chain 1                                  | DYNC1H1           | 1.24  | 6 | 6 | Membrane; extracellular matrix                          |
| P06753             | Tropomyosin alpha-3 chain                                           | TPM3              | 1.22  | 7 | 6 | Cytoplasm; extracellular exosomes                       |
| P08865             | 40S ribosomal protein SA                                            | RPSA              | 1.19  | 6 | 6 | Membrane; extracellular exosomes                        |
| P62826             | GTP-binding nuclear protein Ran                                     | RAN               | 1.18  | 7 | 6 | Membrane; extracellular matrix                          |
| P62888             | 60S ribosomal protein L30                                           | RPL30             | 1.16  | 7 | 6 | Membrane; extracellular matrix                          |
| P05388;Q8NHWS      | 60S acidic ribosomal protein P0                                     | RPLP0;RPLP0P6     | 1.15  | 5 | 6 | Nucleus; extracellular exosomes                         |
| P62993             | Growth factor receptor-bound protein 2                              | GRB2              | 1.14  | 4 | 6 | Golgi apparatus; membrane; extracellular exosomes       |
| P60900             | Proteasome subunit alpha type-6                                     | PSMA6             | 1.13  | 7 | 6 | Nucleus; extracellular exosomes                         |
| Q9UQ80             | Proliferation-associated protein 2G4                                | PA2G4             | 1.12  | 7 | 6 | Nucleus; membrane; extracellular exosomes               |
| P05387             | 60S acidic ribosomal protein P2                                     | RPLP2             | 1.12  | 7 | 6 | Cytoplasm; membrane; extracellular exosomes             |
| O00299             | Chloride intracellular channel protein 1                            | CLIC1             | 1.11  | 7 | 6 | Extracellular space                                     |
| Q15366;P57721      | Poly(rC)-binding protein 2                                          | PCBP2             | 1.11  | 4 | 6 | Nucleus; membrane; extracellular exosomes               |
| P31939             | Bifunctional purine biosynthesis protein PURH                       | ATIC              | 1.11  | 7 | 6 | Membrane; extracellular exosomes                        |
| P50990             | T-complex protein 1 subunit theta                                   | CCT8              | 1.11  | 6 | 6 | Mitochondria; extracellular exosomes                    |
| P25786             | Proteasome subunit alpha type-1                                     | PSMA1             | 1.11  | 5 | 6 | Proteasome; cytosol; extracellular exosomes             |
| O60547             | GDP-mannose 4,6 dehydratase                                         | GMDS              | 1.11  | 6 | 6 | Cytoplasm; extracellular exosomes                       |
| P11586             | C-1-tetrahydrofolate synthase, cytoplasmic                          | MTHFD1            | 1.11  | 6 | 6 | Mitochondria; extracellular exosomes                    |
| P32455             | Interferon-induced guanylate-binding protein 1                      | GBP1              | 1.08  | 5 | 6 | Extracellular space                                     |
| P50570;Q9UQ16      | Dynamin-2                                                           | DNM2              | 1.05  | 3 | 6 | Mitochondria; extracellular exosomes                    |
| P46109             | Crk-like protein                                                    | CRKL              | 1.01  | 3 | 6 | Endosome; extracellular exosomes                        |
| P13611             | Versican core protein                                               | VCAN              | 39.34 | 3 | 7 | Extracellular matrix                                    |
| P08246             | Neutrophil elastase                                                 | ELANE             | 3.28  | 5 | 7 | Extracellular space                                     |
| P06731             | Carcinoembryonic antigen-related cell adhesion molecule 5           | CEACAM5           | 3.18  | 6 | 7 | Plasma membrane; extracellular exosomes                 |
| P20160             | Azurocidin                                                          | AZU1              | 3.18  | 6 | 7 | Extracellular space                                     |
| P05164             | Myeloperoxidase                                                     | MPO               | 2.93  | 7 | 7 | Extracellular space                                     |
| P80188             | Neutrophil gelatinase-associated lipocalin                          | LCN2              | 2.69  | 6 | 7 | Extracellular space                                     |
| Q15046             | Lysine-tRNA ligase                                                  | KARS              | 2.56  | 5 | 7 | Extracellular space                                     |
| P02788             | Lactotransferrin                                                    | LTF               | 2.49  | 7 | 7 | Extracellular space                                     |
| P35754             | Glutaredoxin-1                                                      | GLRX              | 2.32  | 4 | 7 | Nucleus; cytosol; extracellular exosomes                |
| P53999             | Activated RNA polymerase II transcriptional coactivator p15         | SUB1              | 2.19  | 5 | 7 | Nucleus; extracellular exosomes                         |
| Q13162             | Peroxiredoxin-4                                                     | PRDX4             | 2.10  | 5 | 7 | Extracellular space                                     |
| Q15582             | Transforming growth factor-beta-induced protein ig-h3               | TGFB1             | 2.09  | 6 | 7 | Extracellular space                                     |
| P06702             | Protein S100-A9                                                     | S100A9            | 2.05  | 7 | 7 | Extracellular space                                     |
| P56537             | Eukaryotic translation initiation factor 6                          | EIF6              | 1.92  | 6 | 7 | Nucleus; extracellular exosomes                         |
| P61626             | Lysozyme C                                                          | LYZ               | 1.90  | 7 | 7 | Extracellular space                                     |
| P14866             | Heterogeneous nuclear ribonucleoprotein L                           | HNRNPL            | 1.84  | 7 | 7 | Nucleus; extracellular exosomes                         |
| P05109             | Protein S100-A8                                                     | S100A8            | 1.81  | 7 | 7 | Extracellular space                                     |
| P51858             | Hepatooma-derived growth factor                                     | HDGF              | 1.79  | 6 | 7 | Extracellular space                                     |
| P02794             | Ferritin heavy chain                                                | FTH1              | 1.71  | 7 | 7 | Nucleus; cytosol; extracellular matrix                  |
| P26583             | High mobility group protein B2                                      | HMGB2             | 1.70  | 7 | 7 | Extracellular space                                     |
| P05783;CON_H-INV   | Keratin, type I cytoskeletal 18                                     | KRT18             | 1.69  | 7 | 7 | Cytoplasm; extracellular exosomes                       |
| P61604             | 10 kDa heat shock protein                                           | HSPA1             | 1.66  | 7 | 7 | Mitochondria; extracellular exosomes                    |
| P30050             | 60S ribosomal protein L12                                           | RPL12             | 1.57  | 6 | 7 | Nucleolus; cytosol; extracellular matrix                |
| P37802             | Transglutinin-2                                                     | TAGLN2            | 1.56  | 7 | 7 | Extracellular exosomes                                  |
| P09651;Q32P51      | Heterogeneous nuclear ribonucleoprotein A1                          | HNRNPA1;HNRNPA1L2 | 1.54  | 7 | 7 | Nucleus; membrane; extracellular exosomes               |
| P59666;P59665      | Neutrophil defensin 3                                               | DEFA3;DEFA1       | 1.49  | 7 | 7 | Extracellular space                                     |
| P23246             | Splicing factor, proline- and glutamine-rich                        | SFPQ              | 1.49  | 5 | 7 | Nucleus; extracellular matrix                           |
| P09429;B2RPK0      | High mobility group protein B1                                      | HMGB1             | 1.43  | 7 | 7 | Extracellular space                                     |
| P40121             | Macrophage-capping protein                                          | CAPG              | 1.42  | 7 | 7 | Nucleus; extracellular exosomes                         |
| P26641             | Elongation factor 1-gamma                                           | EEF1G             | 1.41  | 7 | 7 | Nucleus; extracellular exosomes                         |
| P67936             | Tropomyosin alpha-4 chain                                           | TPM4              | 1.39  | 6 | 7 | Membrane; extracellular exosomes                        |
| P09525             | Annexin A4                                                          | ANXA4             | 1.37  | 6 | 7 | Nucleus; membrane; extracellular exosomes               |
| Q98RA2             | Thioredoxin domain-containing protein 17                            | TXNDC17           | 1.36  | 6 | 7 | Cytoplasm; extracellular exosomes                       |
| P23284             | Peptidyl-prolyl cis-trans isomerase B                               | PPIB              | 1.34  | 7 | 7 | Nucleus; endoplasmic reticulum; extracellular exosomes  |
| P14174             | Macrophage migration inhibitory factor                              | MIF               | 1.34  | 7 | 7 | Extracellular space                                     |
| O75223             | Gamma-glutamylcyclotransferase                                      | GGCT              | 1.32  | 4 | 7 | Cytoplasm; extracellular exosomes                       |
| P12724             | Eosinophil cationic protein                                         | RNASE3            | 1.31  | 7 | 7 | Extracellular space                                     |
| P02792             | Ferritin light chain                                                | FTL               | 1.30  | 6 | 7 | Nucleus; membrane; extracellular exosomes               |
| P07900;Q14568;Q58F | Heat shock protein HSP 90-alpha                                     | HSP90AA1          | 1.30  | 7 | 7 | Extracellular space                                     |
| P52566             | Rho GDP-dissociation inhibitor 2                                    | ARHGDI2           | 1.30  | 7 | 7 | Membrane; extracellular exosomes                        |
| P07910             | Heterogeneous nuclear ribonucleoproteins C1/C2                      | HNRNPC            | 1.29  | 6 | 7 | Nucleus; membrane; extracellular exosomes               |
| Q01469;A8MUU1      | Fatty acid-binding protein, epidermal                               | FABP5             | 1.24  | 7 | 7 | Cytoplasm; extracellular exosomes                       |
| P19105;O14950      | Myosin regulatory light chain 12A;Myosin regulatory light chain 12B | MYL12A;MYL12B     | 1.23  | 5 | 7 | Cytoplasm; extracellular exosomes                       |
| P08311             | Cathepsin G                                                         | CTSG              | 1.20  | 7 | 7 | Extracellular space                                     |
| Q15185             | Prostaglandin E synthase 3                                          | PTGES3            | 1.18  | 7 | 7 | Nucleus; extracellular exosomes                         |
| P62805             | Histone H4                                                          | HIST1H4A          | 1.16  | 7 | 7 | Extracellular space                                     |
| P14625;Q58FF3      | Endoplasmic                                                         | HSP90B1           | 1.13  | 7 | 7 | Extracellular space                                     |
| P22626             | Heterogeneous nuclear ribonucleoproteins A2/B1                      | HNRNPA2B1         | 1.13  | 7 | 7 | Membrane; extracellular exosomes                        |
| P61978             | Heterogeneous nuclear ribonucleoprotein K                           | HNRNPK            | 1.12  | 7 | 7 | Extracellular matrix                                    |
| P37837             | Transaldolase                                                       | TALDO1            | 1.09  | 7 | 7 | Nucleus; extracellular exosomes                         |
| P13639             | Elongation factor 2                                                 | EEF2              | 1.08  | 7 | 7 | Extracellular matrix                                    |
| P62258             | 14-3-3 protein epsilon                                              | YWHAE             | 1.05  | 7 | 7 | Mitochondria; extracellular exosomes                    |
| Q15084             | Protein disulfide-isomerase A6                                      | PDI6              | 1.02  | 5 | 7 | Endoplasmic reticulum; membrane; extracellular exosomes |
| P00924             | Enolase 1                                                           | ENO1              | 1.02  | 7 | 7 | Extracellular space                                     |

FC: fold change; NC: Normal Colon; CRC: Colorectal cancer
