# Supplementary material for: Innovative methodology for the identification of soluble biomarkers in fresh tissues
Source: PubMed Central journal article supplement (PMC5828218; doi:10.18632/oncotarget.24366), 2018-01-31
Supplement: oncotarget-09-10665-s005.pdf [file oncotarget-09-10665-s005.pdf]

Table S4. Candidate protein biomarkers for CRC-LM

| Protein IDs                 | Protein names                                                            | Gene names  | Log2 FC | NL | CRC-LM | Subcellular localization                     |
|-----------------------------|--------------------------------------------------------------------------|-------------|---------|----|--------|----------------------------------------------|
| P02749                      | Beta-2-glycoprotein 1                                                    | APOH        | 1.00    | 6  | 6      | Extracellular Space                          |
| P67936                      | Tropomyosin alpha-4 chain                                                | TPM4        | 1.01    | 6  | 6      | Cytoplasm; extracellular exosomes            |
| P08246                      | Neutrophil elastase                                                      | ELANE       | 1.01    | 6  | 6      | Extracellular Space                          |
| P35237                      | Serpin B6                                                                | SERPINB6    | 1.01    | 4  | 6      | Cytoplasm; extracellular exosomes            |
| P02787                      | Serotransferrin                                                          | TF          | 1.02    | 6  | 6      | Extracellular Space                          |
| P02647                      | Apolipoprotein A-I                                                       | APOA1       | 1.02    | 6  | 6      | Extracellular Space                          |
| P07225                      | Vitamin K-dependent protein S                                            | PROS1       | 1.04    | 4  | 6      | Extracellular Space                          |
| P04196                      | Histidine-rich glycoprotein                                              | HRG         | 1.06    | 6  | 6      | Extracellular Space                          |
| Q96QK1                      | Vacuolar protein sorting-associated protein 35                           | VPS35       | 1.07    | 6  | 6      | Cytoplasm; extracellular exosomes            |
| P00751                      | Complement factor B                                                      | CFB         | 1.11    | 6  | 6      | Extracellular Space                          |
| P02763                      | Alpha-1-acid glycoprotein 1                                              | ORM1        | 1.11    | 6  | 6      | Extracellular Space                          |
| P68366;A6NHL2               | Tubulin alpha-4A chain                                                   | TUBA4A      | 1.12    | 6  | 6      | Extracellular Space                          |
| P59666;P59665               | Neutrophil defensin 3;HP 3-56                                            | DEFA3;DEFA1 | 1.13    | 6  | 6      | Extracellular Space                          |
| P80188                      | Neutrophil gelatinase-associated lipocalin                               | LCN2        | 1.13    | 6  | 6      | Extracellular Space                          |
| P63092;Q5JWF2;P38405        | Guanine nucleotide-binding protein (G(s) subunit alpha isoforms short    | GNAS        | 1.14    | 5  | 5      | Plasma Membrane; extracellular exosomes      |
| P04179                      | Superoxide dismutase [Mn], mitochondrial                                 | SOD2        | 1.14    | 4  | 6      | Cytoplasm; extracellular exosomes            |
| P02675                      | Fibrinogen beta chain                                                    | FGB         | 1.14    | 6  | 6      | Extracellular Space                          |
| Q9Y3B3                      | Transmembrane emp24 domain-containing protein 7                          | TMED7       | 1.14    | 3  | 4      | Cytoplasm; extracellular exosomes            |
| P00748                      | Coagulation factor XII                                                   | F12         | 1.14    | 5  | 6      | Extracellular Space                          |
| P46926;Q8TDQ7               | Glucosamine-6-phosphate isomerase 1                                      | GNPDA1      | 1.15    | 4  | 5      | Cytoplasm; extracellular exosomes            |
| P50914                      | 60S ribosomal protein L14                                                | RPL14       | 1.16    | 6  | 6      | Membrane; extracellular exosomes             |
| P01008                      | Antithrombin-III                                                         | SERPINC1    | 1.16    | 6  | 6      | Extracellular Space                          |
| P02765                      | Alpha-2-HS-glycoprotein                                                  | AHSG        | 1.16    | 6  | 6      | Extracellular Space                          |
| P15880                      | 40S ribosomal protein S2                                                 | RPS2        | 1.18    | 6  | 6      | Membrane; extracellular exosomes             |
| P13284                      | Gamma-interferon-inducible lysosomal thiol reductase                     | IFI30       | 1.21    | 5  | 6      | Extracellular Space                          |
| P61626                      | Lysozyme C                                                               | LYZ         | 1.22    | 6  | 6      | Extracellular Space                          |
| P04843                      | Dolichyl-diphosphooligosaccharide--protein glycosyltransferase subunit 1 | RPN1        | 1.24    | 6  | 6      | Extracellular Space                          |
| P25311                      | Zinc-alpha-2-glycoprotein                                                | AZGP1       | 1.24    | 6  | 6      | Extracellular Space                          |
| P07585                      | Decorin                                                                  | DCN         | 1.24    | 6  | 5      | Extracellular Space                          |
| P02760                      | Protein AMBP                                                             | AMBP        | 1.25    | 6  | 6      | Extracellular Space                          |
| P06702                      | Protein S100-A9                                                          | S100A9      | 1.30    | 5  | 6      | Extracellular Space                          |
| Q9Y263                      | Phospholipase A-2-activating protein                                     | PLAA        | 1.31    | 4  | 5      | Extracellular space                          |
| P63104                      | 14-3-3 protein zeta/delta                                                | YWHAZ       | 1.32    | 6  | 6      | Cytoplasm; extracellular exosomes            |
| Q9NYU2                      | UDP-glucose:glycoprotein glucosyltransferase 1                           | UGGT1       | 1.34    | 6  | 6      | Cytoplasm; extracellular exosomes            |
| P02746                      | Complement C1q subcomponent subunit B                                    | C1QB        | 1.35    | 5  | 6      | Extracellular Space                          |
| P10909                      | Clusterin                                                                | CLU         | 1.35    | 6  | 6      | Extracellular space                          |
| Q9UBQ0                      | Vacuolar protein sorting-associated protein 29                           | VPS29       | 1.36    | 4  | 6      | Cytoplasm; extracellular exosomes            |
| P02679                      | Fibrinogen gamma chain                                                   | FGG         | 1.36    | 6  | 6      | Extracellular Space                          |
| P29622                      | Kallistatin                                                              | SERPINA4    | 1.36    | 5  | 6      | Extracellular Space                          |
| O14908                      | PDZ domain-containing protein GIPC1                                      | GIPC1       | 1.40    | 4  | 6      | Cytoplasm; extracellular exosomes            |
| P41218                      | Myeloid cell nuclear differentiation antigen                             | MNDA        | 1.42    | 5  | 6      | Nucleus; extracellular exosomes              |
| P21333                      | Filamin-A                                                                | FLNA        | 1.44    | 6  | 6      | Extracellular Space                          |
| P02790                      | Hemopexin                                                                | HPX         | 1.46    | 6  | 6      | Extracellular Space                          |
| O43852                      | Calumenin                                                                | CALU        | 1.48    | 5  | 6      | Extracellular Space                          |
| P05452                      | Tetranectin                                                              | CLEC3B      | 1.50    | 5  | 6      | Extracellular Space                          |
| P41252                      | Isoleucine--tRNA ligase, cytoplasmic                                     | IARS        | 1.50    | 6  | 6      | Cytoplasm; extracellular exosomes            |
| P02766                      | Transthyretin                                                            | TTR         | 1.52    | 6  | 6      | Extracellular Space                          |
| P51884                      | Lumican                                                                  | LUM         | 1.52    | 6  | 6      | Extracellular Space                          |
| P01011                      | Alpha-1-antichymotrypsin;Alpha-1-antichymotrypsin His-Pro-less           | SERPINA3    | 1.55    | 6  | 6      | Extracellular Space                          |
| P11216                      | Glycogen phosphorylase, brain form                                       | PYGB        | 1.57    | 6  | 6      | Cytoplasm; membrane ; extracellular exosomes |
| P19652                      | Alpha-1-acid glycoprotein 2                                              | ORM2        | 1.60    | 6  | 6      | Extracellular Space                          |
| Q9NZ08                      | Endoplasmic reticulum aminopeptidase 1                                   | ERAP1       | 1.62    | 4  | 6      | Extracellular Space                          |
| P09486                      | SPARC                                                                    | SPARC       | 1.63    | 3  | 5      | Extracellular Space                          |
| P01019                      | Angiotensinogen                                                          | AGT         | 1.64    | 6  | 6      | Extracellular Space                          |
| P07357                      | Complement component C8 alpha chain                                      | C8A         | 1.67    | 6  | 6      | Extracellular Space                          |
| Q14520                      | Hyaluronan-binding protein 2                                             | HABP2       | 1.67    | 4  | 6      | Extracellular Space                          |
| Q86UX7                      | Fermitin family homolog 3                                                | FERMT3      | 1.71    | 6  | 6      | Cytoplasm; extracellular exosomes            |
| P01009                      | Alpha-1-antitrypsin                                                      | SERPINA1    | 1.72    | 6  | 6      | Extracellular Space                          |
| P02774                      | Vitamin D-binding protein                                                | GC          | 1.75    | 6  | 6      | Extracellular Space                          |
| Q9Y6R7                      | IgGfC-binding protein                                                    | FCGBP       | 1.77    | 5  | 5      | Extracellular Space                          |
| P49411                      | Elongation factor Tu, mitochondrial                                      | TUFM        | 1.79    | 6  | 6      | extracellular exosomes                       |
| P29966                      | Myristoylated alanine-rich C-kinase substrate                            | MARCKS      | 1.83    | 5  | 6      | Plasma Membrane; extracellular exosomes      |
| P07360                      | Complement component C8 gamma chain                                      | C8G         | 1.85    | 6  | 6      | Extracellular Space                          |
| P35613                      | Basigin                                                                  | BSG         | 1.86    | 5  | 5      | Extracellular space                          |
| Q12805                      | EGF-containing fibulin-like extracellular matrix protein 1               | EFEMP1      | 1.86    | 6  | 6      | Extracellular Space                          |
| P07195                      | L-lactate dehydrogenase B chain                                          | LDHB        | 1.87    | 6  | 6      | Cytoplasm; extracellular exosomes            |
| P07358                      | Complement component C8 beta chain                                       | C8B         | 1.89    | 5  | 6      | Extracellular Space                          |
| P98160                      | Basement membrane-specific heparan sulfate proteoglycan core protein     | HSPG2       | 1.91    | 6  | 6      | Extracellular Space                          |
| P00747                      | Plasminogen                                                              | PLG         | 1.91    | 6  | 6      | Extracellular Space                          |
| Q7Z6Z7                      | E3 ubiquitin-protein ligase HUWE1                                        | HUWE1       | 1.93    | 6  | 6      | Nucleus; extracellular exosomes              |
| P06727                      | Apolipoprotein A-IV                                                      | APOA4       | 1.93    | 6  | 6      | Extracellular Space                          |
| P07602                      | Proactivator polypeptide                                                 | PSAP        | 1.95    | 6  | 6      | Extracellular Space                          |
| P10643                      | Complement component C7                                                  | C7          | 1.99    | 6  | 6      | Extracellular Space                          |
| Q01813                      | 6-phosphofructokinase type C                                             | PFKP        | 2.00    | 6  | 6      | Cytoplasm; extracellular matrix              |
| P12109                      | Collagen alpha-1(VI) chain                                               | COL6A1      | 2.02    | 4  | 6      | Extracellular Space                          |
| P11177                      | Pyruvate dehydrogenase E1 component subunit beta, mitochondrial          | PDHB        | 2.05    | 6  | 6      | Nucleus; extracellular exosomes              |
| Q00610                      | Claudin heavy chain 1                                                    | CLTC        | 2.08    | 6  | 6      | Plasma Membrane; extracellular matrix        |
| P15151                      | Poliovirus receptor                                                      | PVR         | 2.09    | 4  | 6      | Extracellular Space                          |
| P06396                      | Gelsolin                                                                 | GSN         | 2.14    | 6  | 6      | Extracellular Space                          |
| P30740                      | Leukocyte elastase inhibitor                                             | SERPINB1    | 2.15    | 6  | 6      | Cytoplasm; extracellular exosomes            |
| P21810                      | Biglycan                                                                 | BGN         | 2.17    | 6  | 6      | Extracellular Space                          |
| P08670;P17661;Q16352;P07197 | Vimentin                                                                 | VIM         | 2.23    | 6  | 6      | Cytoplasm; extracellular space               |
| P24821                      | Tenascin                                                                 | TNC         | 2.26    | 5  | 6      | Extracellular Space                          |
| P00488                      | Coagulation factor XIII A chain                                          | F13A1       | 2.31    | 3  | 5      | Extracellular Space                          |
| Q9Y265                      | RuvB-like 1                                                              | RUVBL1      | 2.32    | 6  | 6      | Nucleus; extracellular exosomes              |
| P60903                      | Protein S100-A10                                                         | S100A10     | 2.38    | 6  | 6      | Extracellular Space                          |
| Q15582                      | Transforming growth factor-beta-induced protein ig-h3                    | TGFB1       | 2.44    | 6  | 6      | Extracellular Space                          |
| Q9NZU5                      | LIM and cysteine-rich domains protein 1                                  | LMCD1       | 2.50    | 3  | 5      | Extracellular Space                          |
| Q9BVK6                      | Transmembrane emp24 domain-containing protein 9                          | TMED9       | 2.56    | 4  | 5      | Cytoplasm; extracellular exosomes            |
| P18428                      | Lipoplysaccharide-binding protein                                        | LBP         | 2.66    | 4  | 6      | Extracellular Space                          |
| P06703                      | Protein S100-A6                                                          | S100A6      | 2.67    | 6  | 6      | Cytoplasm; extracellular exosomes            |
| P50454                      | Serpin H1                                                                | SERPINH1    | 2.67    | 5  | 6      | Extracellular Space                          |
| Q9P2R7                      | Succinyl-CoA ligase [ADP-forming] subunit beta, mitochondrial            | SUCLA2      | 2.72    | 5  | 5      | Cytoplasm; extracellular exosomes            |
| Q01469;A8MUU1               | Fatty acid-binding protein, epidermal                                    | FABP5       | 2.79    | 6  | 6      | Cytoplasm; extracellular exosomes            |

|                   |                                                                             |         |        |   |   |                                             |
|-------------------|-----------------------------------------------------------------------------|---------|--------|---|---|---------------------------------------------|
| P02751            | Fibronectin                                                                 | FN1     | 2.83   | 6 | 6 | Extracellular Space                         |
| O00299            | Chloride intracellular channel protein 1                                    | CLIC1   | 2.87   | 6 | 6 | Extracellular Space                         |
| Q15113            | Procollagen C-endopeptidase enhancer 1                                      | PCOLCE  | 2.89   | 4 | 6 | Extracellular Space                         |
| Q92598            | Heat shock protein 105 kDa                                                  | HSPH1   | 2.90   | 6 | 6 | Extracellular Space                         |
| P22695            | Cytochrome b-c1 complex subunit 2, mitochondrial                            | UQCRC2  | 2.93   | 6 | 6 | Mitochondria; extracellular exosomes        |
| P12004            | Proliferating cell nuclear antigen                                          | PCNA    | 2.95   | 6 | 6 | Nucleus; extracellular exosomes             |
| P14618            | Pyruvate kinase isozymes M1/M2                                              | PKM     | 3.01   | 6 | 6 | Cytoplasm; extracellular matrix             |
| Q14195            | Dihydropyrimidinase-related protein 3                                       | DPYSL3  | 3.10   | 6 | 6 | Extracellular Space                         |
| P12111            | Collagen alpha-3(VI) chain                                                  | COL6A3  | 3.26   | 4 | 6 | Extracellular Space                         |
| Q72406            | Myosin-14                                                                   | MYH14   | 3.30   | 6 | 6 | Extracellular Space                         |
| P02748;CON_Q3MHN2 | Complement component C9                                                     | C9      | 3.36   | 6 | 6 | Extracellular Space                         |
| P17844            | Probable ATP-dependent RNA helicase DDX5                                    | DDX5    | 3.37   | 4 | 6 | Extracellular matrix                        |
| P12277            | Creatine kinase B-type                                                      | CKB     | 3.63   | 6 | 6 | Extracellular Space                         |
| Q12931            | Heat shock protein 75 kDa, mitochondrial                                    | TRAP1   | 3.75   | 4 | 6 | Cytoplasm; extracellular exosomes           |
| P07996            | Thrombospondin-1                                                            | THBS1   | 3.82   | 6 | 6 | Extracellular Space                         |
| Q15149            | Plectin                                                                     | PLEC    | 3.88   | 6 | 6 | Cytoplasm; extracellular exosomes           |
| P09327;O75366     | Villin-1                                                                    | VIL1    | 4.03   | 5 | 6 | Cytoplasm; extracellular exosomes           |
| P17931            | Galectin-3                                                                  | LGALS3  | 4.06   | 5 | 6 | Extracellular Space                         |
| Q99715            | Collagen alpha-1(XII) chain                                                 | COL12A1 | 4.10   | 5 | 5 | Extracellular Space                         |
| Q9HC84;P98088     | Mucin-5B                                                                    | MUC5B   | 4.29   | 4 | 5 | Extracellular Space                         |
| Q14764            | Major vault protein                                                         | MVP     | 4.72   | 6 | 6 | Nucleus; extracellular exosomes             |
| P78527            | DNA-dependent protein kinase catalytic subunit                              | PRKDC   | 5.20   | 6 | 6 | Extracellular matrix; nucleus               |
| Q8IUX7            | Adipocyte enhancer-binding protein 1                                        | AEBP1   | 5.80   | 5 | 6 | Extracellular Space                         |
| P01033            | Metalloproteinase inhibitor 1                                               | TIMP1   | 6.87   | 4 | 6 | Extracellular Space                         |
| P23921            | Ribonucleoside-diphosphate reductase large subunit                          | RRM1    | CRC-LM | 0 | 3 | Nucleus; extracellular exosomes             |
| Q92520            | Protein FAM3C                                                               | FAM3C   | CRC-LM | 0 | 3 | Extracellular Space                         |
| P15169            | Carboxypeptidase N catalytic chain                                          | CPN1    | CRC-LM | 0 | 3 | Extracellular Space                         |
| P36222            | Chitinase-3-like protein 1                                                  | CHI3L1  | CRC-LM | 0 | 3 | Extracellular Space                         |
| Q15813            | Tubulin-specific chaperone E                                                | TBCE    | CRC-LM | 0 | 3 | Cytoplasm; extracellular exosomes           |
| O94919            | Endonuclease domain-containing 1 protein                                    | ENDOD1  | CRC-LM | 0 | 3 | Extracellular Space                         |
| Q14828            | Secretory carrier-associated membrane protein 3                             | SCAMP3  | CRC-LM | 0 | 3 | Cytoplasm; extracellular exosomes           |
| Q14254            | Flotillin-2                                                                 | FLOT2   | CRC-LM | 0 | 3 | Plasma Membrane; extracellular exosomes     |
| Q14344            | Guanine nucleotide-binding protein subunit alpha-13                         | GNAL3   | CRC-LM | 0 | 3 | Plasma Membrane; extracellular exosomes     |
| O43657            | Tetraspanin-6                                                               | TSPAN6  | CRC-LM | 0 | 3 | Plasma Membrane; extracellular exosomes     |
| Q9H954            | Calcium-binding protein 39-like                                             | CAB39L  | CRC-LM | 0 | 3 | Cytoplasm; extracellular exosomes           |
| A3KMH1            | von Willebrand factor A domain-containing protein 8                         | VWA8    | CRC-LM | 0 | 3 | Extracellular Space                         |
| Q9Y5X1            | Sorting nexin-9                                                             | SNX9    | CRC-LM | 0 | 3 | Cytoplasm; extracellular exosomes           |
| P62070            | Ras-related protein R-Ras2                                                  | RRAS2   | 19.51  | 3 | 5 | Plasma Membrane; extracellular exosomes     |
| O43278            | Kunitz-type protease inhibitor 1                                            | SPINT1  | CRC-LM | 0 | 3 | Extracellular Space                         |
| P33241            | Lymphocyte-specific protein 1                                               | LSP1    | CRC-LM | 0 | 3 | Plasma Membrane; extracellular exosomes     |
| Q9BW59            | Chitinase domain-containing protein 1                                       | CHID1   | CRC-LM | 0 | 3 | Extracellular Space                         |
| Q06828            | Fibromodulin                                                                | FMOD    | CRC-LM | 0 | 3 | Extracellular Space                         |
| P41222            | Prostaglandin-H2 D-isomerase                                                | PTGDS   | CRC-LM | 0 | 3 | Extracellular Space                         |
| Q9NRN5            | Olfactomedin-like protein 3                                                 | OLFML3  | CRC-LM | 0 | 3 | Extracellular Space                         |
| P13473            | Lysosome-associated membrane glycoprotein 2                                 | LAMP2   | CRC-LM | 0 | 3 | Extracellular Space                         |
| Q9UGM5            | Fetuin-B                                                                    | FETUB   | CRC-LM | 0 | 3 | Extracellular Space                         |
| Q9NR99            | Matrix-remodeling-associated protein 5                                      | MXRA5   | CRC-LM | 0 | 3 | Extracellular Space                         |
| Q9NQC3            | Reticulon-4                                                                 | RTN4    | 20.24  | 3 | 6 | Plasma Membrane; extracellular exosomes     |
| O43760            | Synaptogyrin-2                                                              | SYNGR2  | CRC-LM | 0 | 3 | Cytoplasm; extracellular exosomes           |
| Q8TD06            | Anterior gradient protein 3 homolog                                         | AGR3    | CRC-LM | 0 | 3 | Extracellular Space                         |
| O96008            | Mitochondrial import receptor subunit TOM40 homolog                         | TOMM40  | CRC-LM | 0 | 3 | Cytoplasm; extracellular exosomes           |
| Q968Q1            | Protein FAM3D                                                               | FAM3D   | CRC-LM | 0 | 3 | Extracellular Space                         |
| Q16610            | Extracellular matrix protein 1                                              | ECM1    | 20.75  | 3 | 6 | Extracellular Space                         |
| Q15437            | Protein transport protein Sec23B                                            | SEC23B  | 20.76  | 3 | 6 | Extracellular Space                         |
| Q07654            | Trefoil factor 3                                                            | TFF3    | CRC-LM | 0 | 3 | Extracellular Space                         |
| P17900            | Ganglioside GM2 activator                                                   | GM2A    | 20.95  | 3 | 6 | Mitochondria; extracellular exosomes        |
| Q16819            | Meprin A subunit alpha                                                      | MEP1A   | 22.22  | 3 | 6 | Extracellular Space                         |
| Q96TA1            | Niban-like protein 1                                                        | FAM129B | 22.35  | 3 | 6 | Cytoplasm; extracellular exosomes           |
| P00746            | Complement factor D                                                         | CFD     | 23.06  | 3 | 6 | Extracellular Space                         |
| P45880            | Voltage-dependent anion-selective channel protein 2                         | VDAC2   | 23.32  | 3 | 5 | Cytoplasm; extracellular exosomes           |
| P31949            | Protein S100-A11                                                            | S100A11 | 23.59  | 3 | 6 | Extracellular Space                         |
| O95994            | Anterior gradient protein 2 homolog                                         | AGR2    | 23.71  | 3 | 6 | Extracellular Space                         |
| P24593            | Insulin-like growth factor-binding protein 5                                | IGFBP5  | CRC-LM | 0 | 4 | Extracellular Space                         |
| Q9ULE6            | Paladin                                                                     | PALD1   | CRC-LM | 0 | 4 | Cytoplasm; extracellular exosomes           |
| P14543            | Nidogen-1                                                                   | NID1    | CRC-LM | 0 | 4 | Extracellular Space                         |
| P04155            | Trefoil factor 1                                                            | TFF1    | CRC-LM | 0 | 4 | Extracellular Space                         |
| P48960            | CD97 antigen                                                                | CD97    | CRC-LM | 0 | 6 | Extracellular Space                         |
| Q9BVP2            | Guanine nucleotide-binding protein-like 3                                   | GNL3    | CRC-LM | 0 | 5 | Extracellular Space                         |
| Q9H2P0            | Activity-dependent neuroprotector homeobox protein                          | ADNP    | CRC-LM | 0 | 5 | Extracellular Space                         |
| Q6UX71            | Plexin domain-containing protein 2                                          | PLXDC2  | CRC-LM | 0 | 5 | Extracellular Space                         |
| P07942            | Laminin subunit beta-1                                                      | LAMB1   | CRC-LM | 0 | 6 | Extracellular Space                         |
| P51911            | Calponin-1                                                                  | CNN1    | CRC-LM | 0 | 4 | Cytoplasm; membrane; extracellular exosomes |
| Q10713            | Mitochondrial-processing peptidase subunit alpha                            | PMPCA   | CRC-LM | 0 | 4 | Extracellular space                         |
| P20908            | Collagen alpha-1(V) chain                                                   | COL5A1  | CRC-LM | 0 | 4 | Extracellular Space                         |
| Q92599            | Septin-8                                                                    | SEPT8   | CRC-LM | 0 | 5 | Extracellular Space                         |
| P02461            | Collagen alpha-1(III) chain                                                 | COL3A1  | CRC-LM | 0 | 5 | Extracellular Space                         |
| P61803            | Dolichyl-diphosphooligosaccharide--protein glycosyltransferase subunit DAD1 | DAD1    | CRC-LM | 0 | 5 | Cytoplasm; membrane; extracellular exosomes |
| P11047            | Laminin subunit gamma-1                                                     | LAMC1   | CRC-LM | 0 | 5 | Extracellular Space                         |
| Q14767            | Latent-transforming growth factor beta-binding protein 2                    | LTBP2   | CRC-LM | 0 | 4 | Extracellular Space                         |
| Q96CG8            | Collagen triple helix repeat-containing protein 1                           | CTHRC1  | CRC-LM | 0 | 4 | Extracellular Space                         |
| P34096            | Ribonuclease 4                                                              | RNASE4  | CRC-LM | 0 | 5 | Extracellular Space                         |
| P16444            | Dipeptidase 1                                                               | DPEP1   | CRC-LM | 0 | 5 | Extracellular Space                         |
| Q8TE67            | Epidermal growth factor receptor kinase substrate 8-like protein 3          | EPS8L3  | CRC-LM | 0 | 5 | Extracellular Space                         |
| P49747            | Cartilage oligomeric matrix protein                                         | COMP    | CRC-LM | 0 | 6 | Extracellular Space                         |
| Q8NFJ5            | Retinoic acid-induced protein 3                                             | GRPC5A  | CRC-LM | 0 | 5 | Plasma Membrane; extracellular exosomes     |
| O00391            | Sulfhydryl oxidase 1                                                        | QSOX1   | CRC-LM | 0 | 6 | Extracellular space                         |
| P55058            | Phospholipid transfer protein                                               | PLTP    | CRC-LM | 0 | 4 | Extracellular Space                         |
| P25815            | Protein S100-P                                                              | S100P   | CRC-LM | 0 | 5 | Cytoplasm; extracellular exosomes           |

FC: fold change; NL: Normal Liver; CRC-LM: Colorectal cancer Liver Metastasis
